# Supplementary material
Source: PubMed Central journal article supplement (PMC3242796)

## Supplementary Figure 1

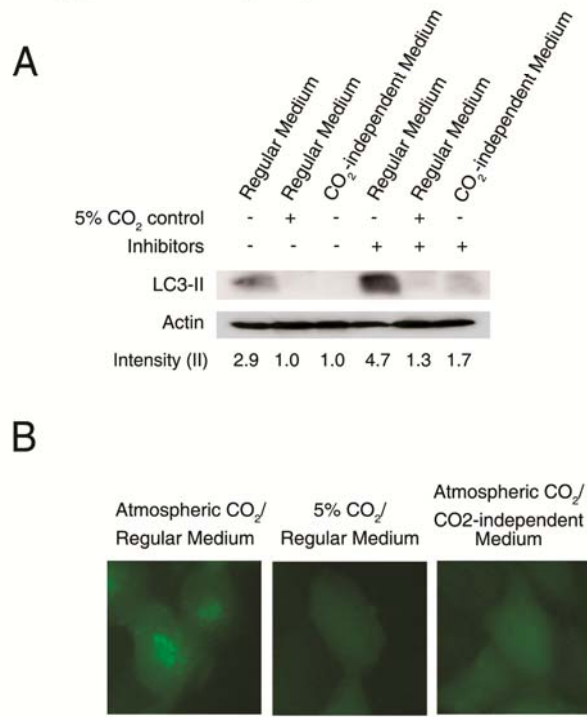

**Supplementary Fig 1.** Autophagic activity under different culture conditions. MCF-10A cells (A) or MCF-10A cells stably expressing GFP-LC3 (B) were cultured in CO<sub>2</sub>-dependent DMEM-F12 medium (*Regular Medium*). During the experiment, cells were incubated either in the regular medium or in CO<sub>2</sub>-independent medium for 6 h in the presence or absence of lysosomal inhibitors as indicated. 5% CO<sub>2</sub> control was achieved using a regular cell culture incubator to maintain the pH of the regular medium. Autophagic activity was assessed by western blot for LC3 (A) and GFP-LC3 punctate formation assay (B).

**Supplementary Figure 2**

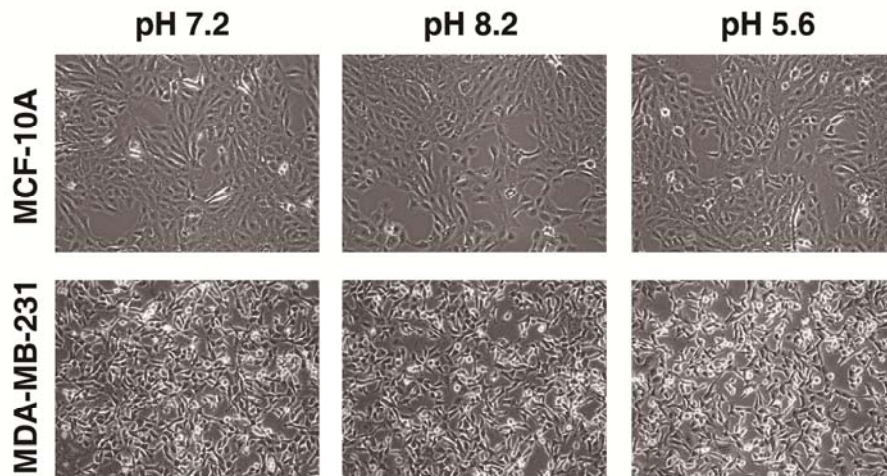

**Supplementary Fig 2.** Cell morphology after incubation in media of different pHs. MCF-10A (A) and MDA-MB-231 (B) cells were incubated in media of different pHs as indicated for 6 h. After that, cell morphology was examined by phase-contrast microscopy.

### Supplementary Figure 3

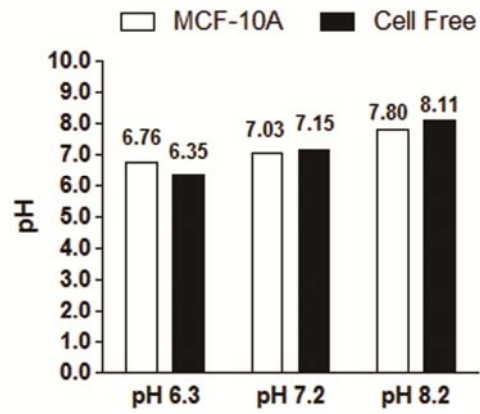

**Supplementary Fig 3.** pH of culture medium before and after the experiment (6 h) was measured with three different initial pHs (6.3, 7.2 and 8.2). Experiments were performed either with the culture of MCF-10A cells or in a cell-free setting. X-axis indicates the initial pHs and Y-axis indicates the pH after the course of experiment (6 h).

|                   | Relative Intensity (LC3-II) |
|-------------------|-----------------------------|
| pH 7.2            | 1.0                         |
| pH 7.2 +Inhibitor | 1.4                         |
| pH 8.2            | 1.4                         |
| pH 8.2 +Inhibitor | 4.7                         |
| pH 8.0            | 1.2                         |
| pH 8.0 +Inhibitor | 4.7                         |
| pH 7.8            | 1.1                         |
| pH 7.8 +Inhibitor | 3.7                         |
| pH 7.6            | 1.0                         |
| pH 7.6 +Inhibitor | 1.4                         |

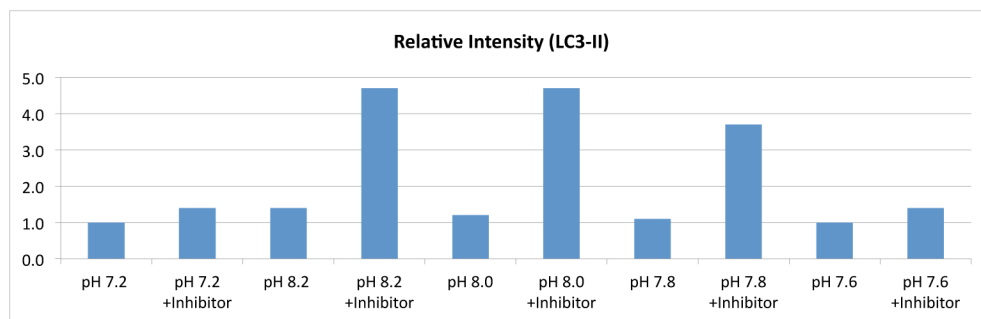

Figure 2B

| MCF-7             |                             | Ratio (LC3 II/I)  |     |
|-------------------|-----------------------------|-------------------|-----|
|                   | Relative Intensity (LC3-II) |                   |     |
| pH 7.2            | 1.0                         | pH 7.2            | 0.4 |
| pH 7.2 +Inhibitor | 2.7                         | pH 7.2 +Inhibitor | 0.6 |
| pH 8.0            | 2.3                         | pH 8.0            | 2.3 |
| pH 8.0 +Inhibitor | 2.8                         | pH 8.0 +Inhibitor | 2.5 |

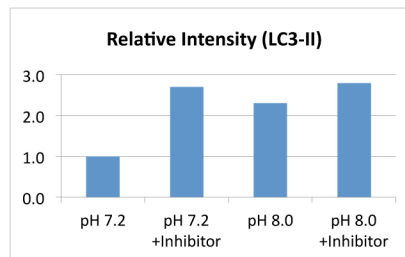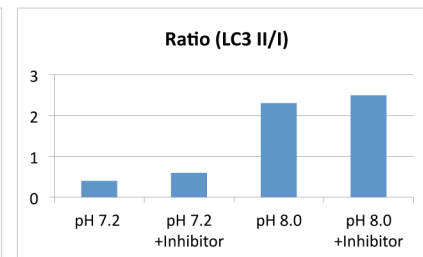

| Hela              |                             | Ratio (LC3 II/I)  |     |
|-------------------|-----------------------------|-------------------|-----|
|                   | Relative Intensity (LC3-II) |                   |     |
| pH 7.2            | 1.0                         | pH 7.2            | 0.9 |
| pH 7.2 +Inhibitor | 2.2                         | pH 7.2 +Inhibitor | 1.5 |
| pH 8.0            | 2.0                         | pH 8.0            | 1.8 |
| pH 8.0 +Inhibitor | 2.4                         | pH 8.0 +Inhibitor | 3   |

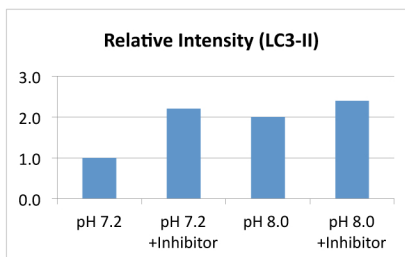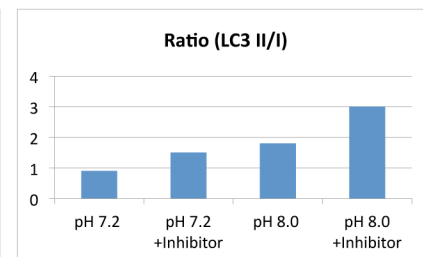

Figure 2C

|                   | Relative Intensity (LC3-II) |
|-------------------|-----------------------------|
| pH 7.2            | 1.0                         |
| pH 7.2 +Inhibitor | 2.7                         |
| pH 5.6            | 0.6                         |
| pH 5.6 +Inhibitor | 0.6                         |
| pH 6.3            | 0.6                         |
| pH 6.3 +Inhibitor | 1.3                         |
| pH 6.6            | 0.8                         |
| pH 6.6 +Inhibitor | 1.5                         |
| pH 6.8            | 1.1                         |
| pH 6.8 +Inhibitor | 2.2                         |

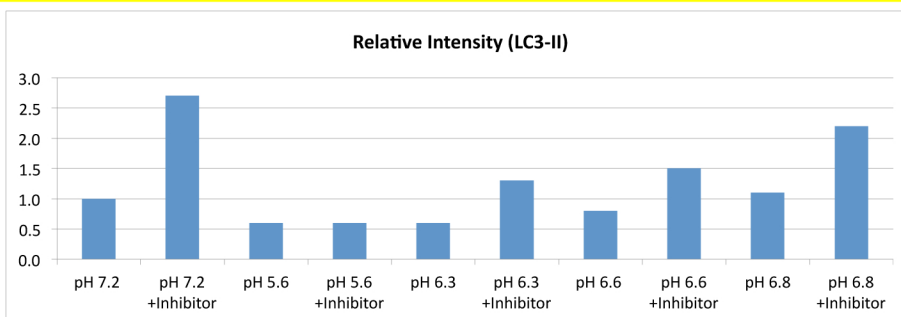

**Figure 2D**

|                   | Relative Intensity (LC3-II) |
|-------------------|-----------------------------|
| pH 7.2            | 1.0                         |
| pH 7.2 +Inhibitor | 2.5                         |
| pH 8.0            | 2.4                         |
| pH 8.0 +Inhibitor | 5.1                         |
| HAc               | 0.5                         |
| HAc +Inhibitor    | 0.5                         |

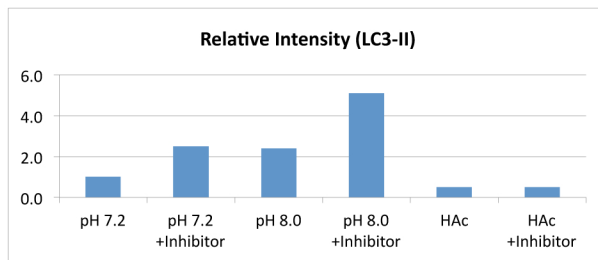

**Figure 2E**

|               | Relative Intensity (LC3-II) |
|---------------|-----------------------------|
| pH 7.2        | 1.0                         |
| EBSS (pH 7.2) | 1.7                         |
| EBSS (pH 7.0) | 1.6                         |
| EBSS (pH 6.7) | 1.6                         |
| EBSS (pH 6.3) | 1.5                         |
| EBSS (pH 5.6) | 1.2                         |

|               | Ratio (LC3 II/I) |
|---------------|------------------|
| pH 7.2        | 1.2              |
| EBSS (pH 7.2) | 3.2              |
| EBSS (pH 7.0) | 2.8              |
| EBSS (pH 6.7) | 2.6              |
| EBSS (pH 6.3) | 2.5              |
| EBSS (pH 5.6) | 1.6              |

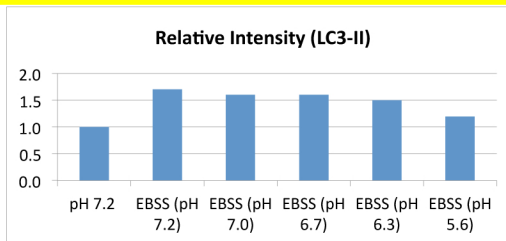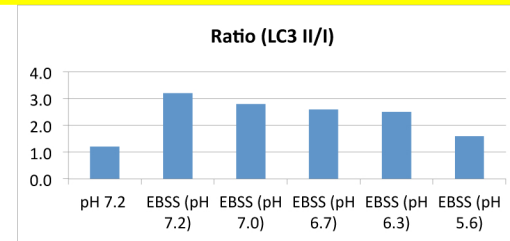

**Figure 2F**

|                          | Relative Intensity (LC3-II) |
|--------------------------|-----------------------------|
| EBSS (pH 7.8)            | 1.0                         |
| EBSS (pH 7.8) +Inhibitor | 1.5                         |
| pH 7.2                   | 0.3                         |
| pH 7.2 +Inhibitor        | 1.3                         |
| EBSS (pH 7.2)            | 0.7                         |
| EBSS (pH 7.2) +Inhibitor | 1.4                         |
| EBSS (pH 5.6)            | 0.2                         |
| EBSS (pH 5.6) +Inhibitor | 0.3                         |

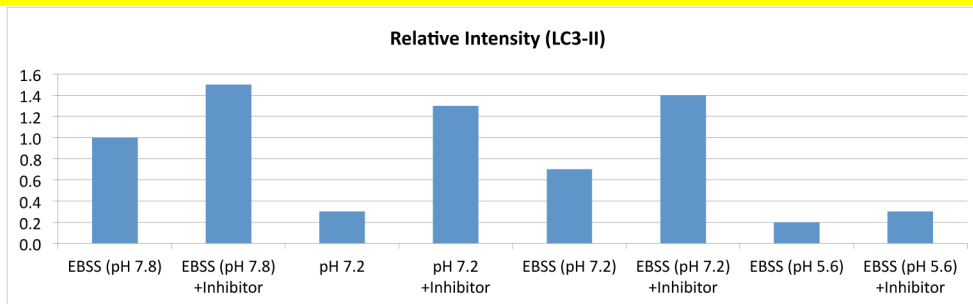

|                          | Ratio (LC3 II/I) |
|--------------------------|------------------|
| EBSS (pH 7.8)            | 2.0              |
| EBSS (pH 7.8) +Inhibitor | 2.8              |
| pH 7.2                   | 0.4              |
| pH 7.2 +Inhibitor        | 1.6              |
| EBSS (pH 7.2)            | 1.5              |
| EBSS (pH 7.2) +Inhibitor | 3.2              |
| EBSS (pH 5.6)            | 0.4              |
| EBSS (pH 5.6) +Inhibitor | 0.8              |

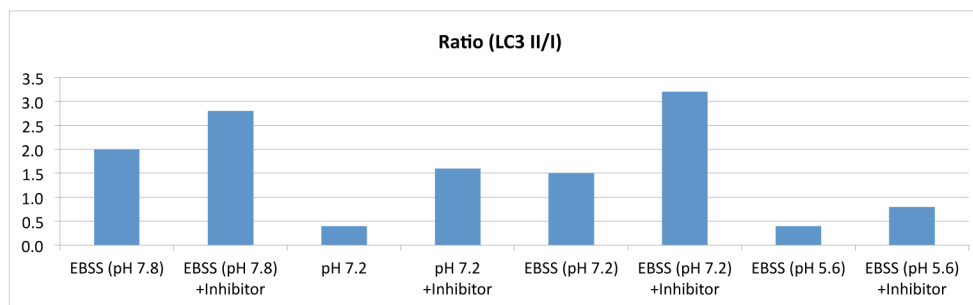

**Figure 3B**

|        | Relative Intensity (LC3-II) |
|--------|-----------------------------|
| pH 7.2 | 1.0                         |
| 0 min  | 6.3                         |
| 30 min | 5.8                         |
| 60 min | 2.0                         |
| 90 min | 1.4                         |

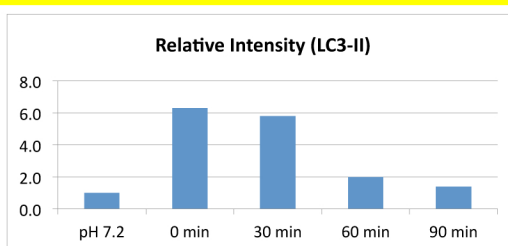

**Figure 4B**

Upper Panel

|                           | Relative Intensity (LC3-II) |
|---------------------------|-----------------------------|
| siGL2 (pH7.2)             | 1.0                         |
| siGL2 (pH7.2) +Inhibitor  | 2.3                         |
| siGL2 (pH8.0)             | 2.5                         |
| siGL2 (pH8.0) +Inhibitor  | 5.6                         |
| siATG5 (pH7.2)            | 0.8                         |
| siATG5 (pH7.2) +Inhibitor | 1.2                         |
| siATG5 (pH8.0)            | 1.0                         |
| siATG5 (pH8.0) +Inhibitor | 3.3                         |

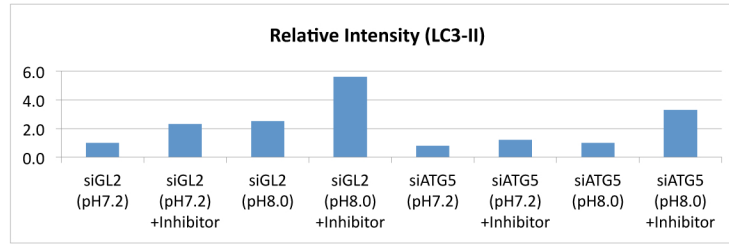

Lower Panel

|                              | Relative Intensity (LC3-II) |
|------------------------------|-----------------------------|
| siVps34 (pH7.2)              | 1.0                         |
| siVps34 (pH7.2) +Inhibitor   | 1.1                         |
| siVps34 (pH8.0)              | 1.3                         |
| siVps34 (pH8.0) +Inhibitor   | 3.4                         |
| siGL2 (pH7.2)                | 1.0                         |
| siGL2 (pH7.2) +Inhibitor     | 2.3                         |
| siGL2 (pH8.0)                | 2.6                         |
| siGL2 (pH8.0) +Inhibitor     | 7.2                         |
| siBeclin1 (pH7.2)            | 1.2                         |
| siBeclin1 (pH7.2) +Inhibitor | 1.3                         |
| siBeclin1 (pH8.0)            | 1.2                         |
| siBeclin1 (pH8.0) +Inhibitor | 3.4                         |

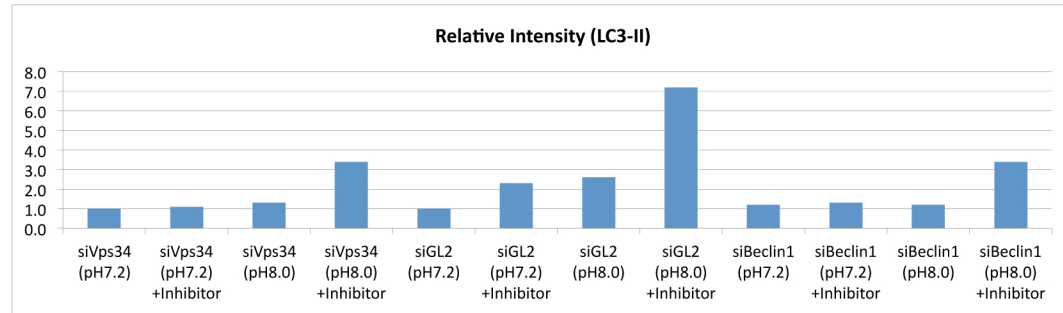

**Figure 5B**

|                   | Relative Intensity (LC3-II) |
|-------------------|-----------------------------|
| pH 8.2            | 3.3                         |
| pH 8.2 +Inhibitor | 4.0                         |
| pH 7.2            | 1.0                         |
| pH 7.2 +Inhibitor | 2.7                         |
| pH 6.3            | 0.9                         |
| pH 6.3 +Inhibitor | 2.0                         |
| pH 6.8            | 1.7                         |
| pH 6.8 +Inhibitor | 1.7                         |

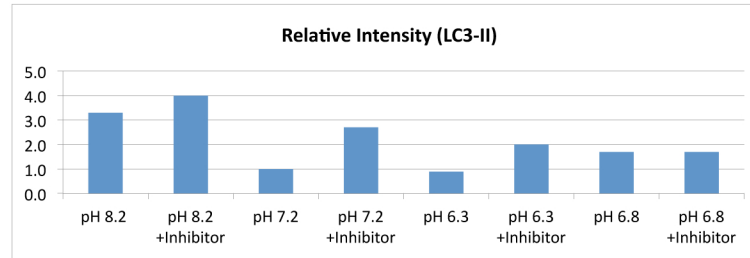

|                   | Ratio (LC3 II/I) |
|-------------------|------------------|
| pH 8.2            | 2.2              |
| pH 8.2 +Inhibitor | 4.5              |
| pH 7.2            | 1.8              |
| pH 7.2 +Inhibitor | 2.9              |
| pH 6.3            | 0.5              |
| pH 6.3 +Inhibitor | 0.9              |
| pH 6.8            | 0.9              |
| pH 6.8 +Inhibitor | 1.9              |

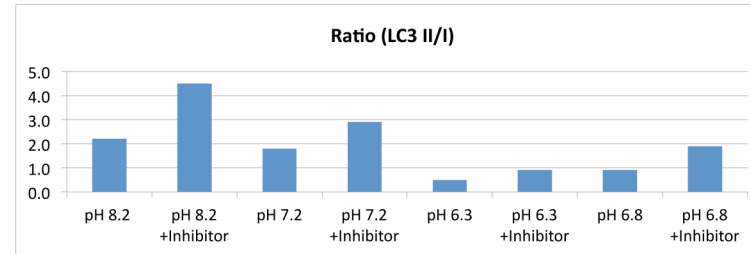

Supplement: auto0711_1316SD1.pdf [file auto0711_1316SD1.pdf]
